# Supplementary material for: Characterizing the microstructural basis of “unidentified bright objects” in neurofibromatosis type 1: A combined in vivo multicomponent T2 relaxation and multi-shell diffusion MRI analysis
Source: PubMed Central journal article supplement — Neuroimage Clin. 2014 Apr 13;4:649–58. doi: 10.1016/j.nicl.2014.04.005 (PMC4053637; doi:10.1016/j.nicl.2014.04.005), 2014-04-13
Supplement: mmc2.pdf [file mmc2.pdf]

Amplitude (a.u.)

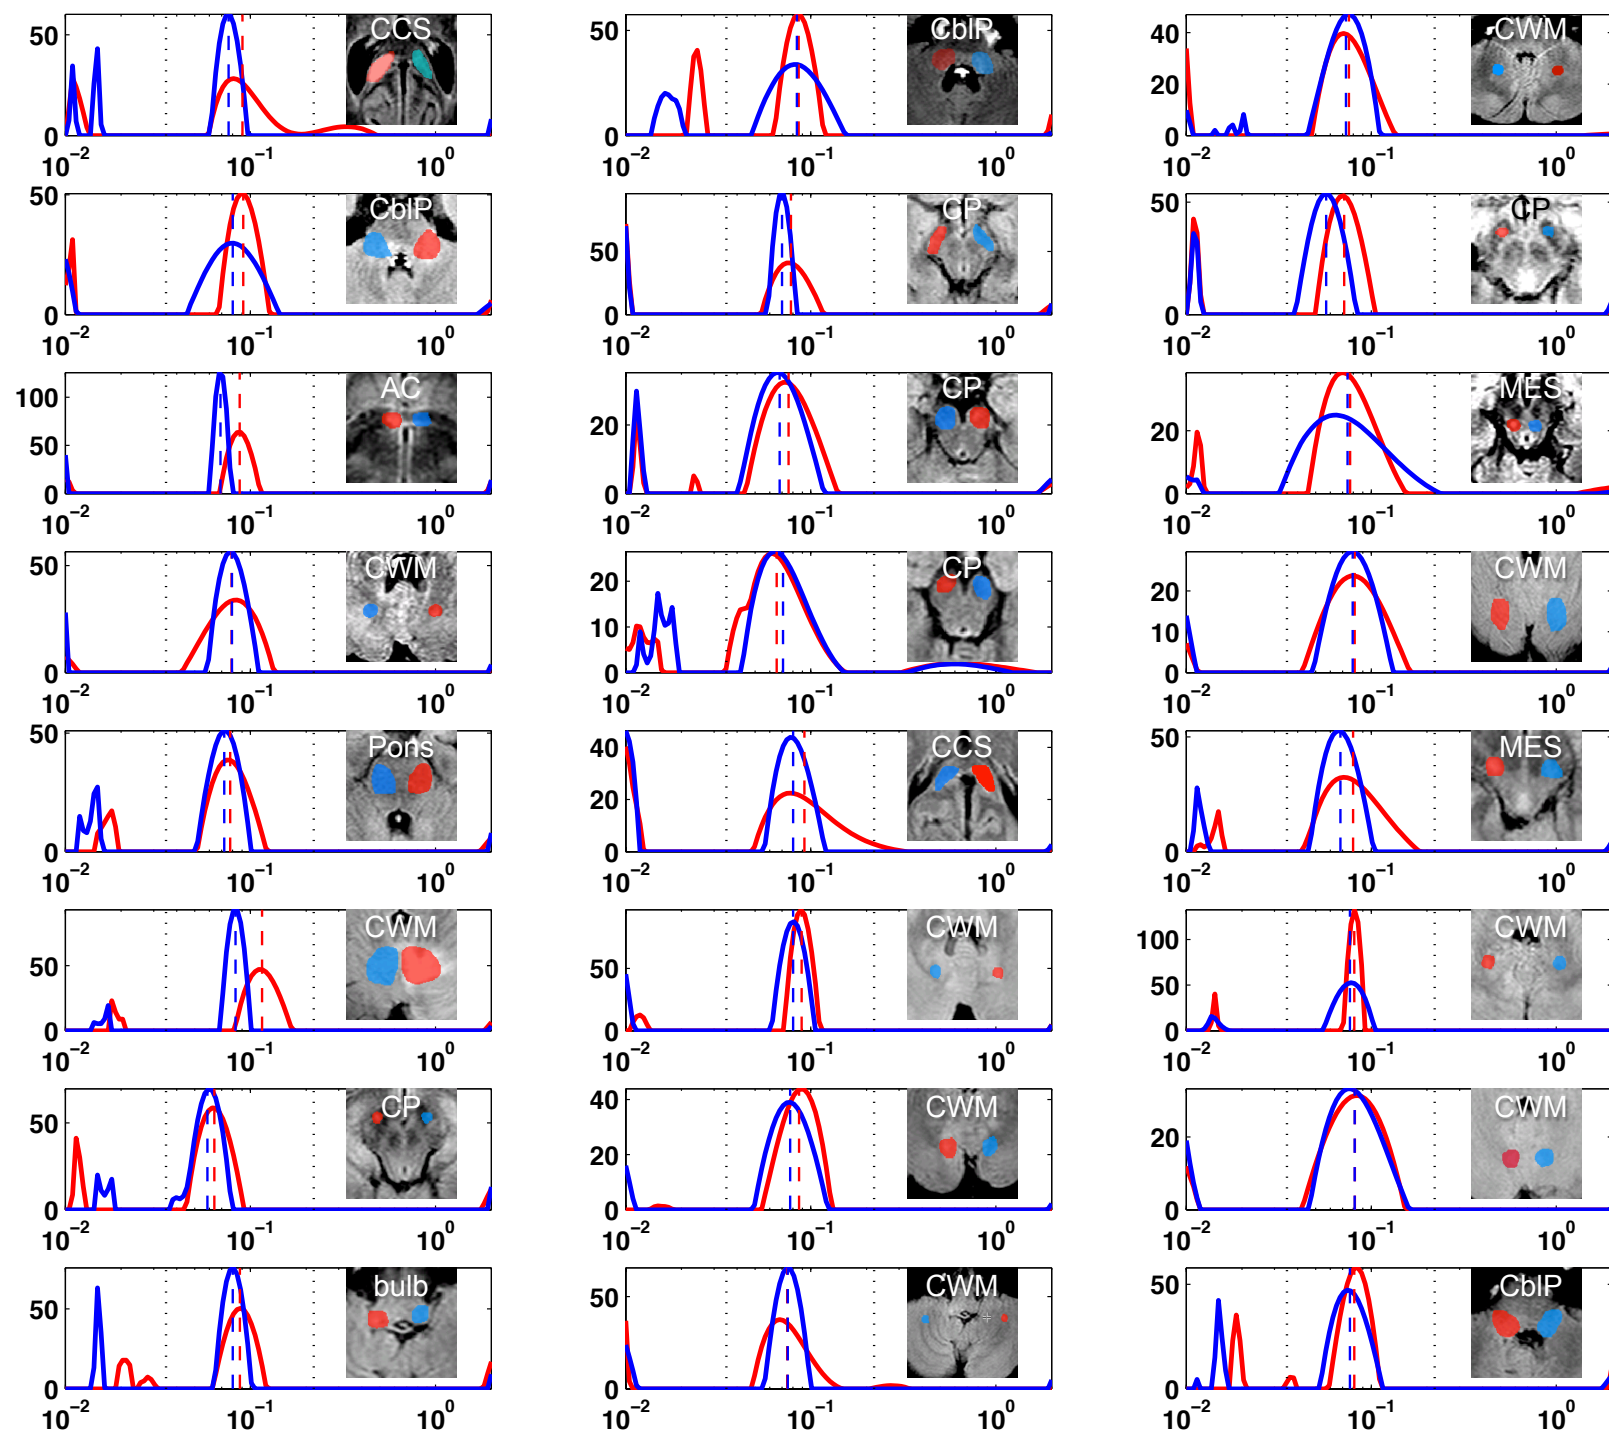

T2 relaxation time (s)

ESM2: T2 distribution of white matter UBOs (red) and cNAWM (blue) illustrating myelin water peaks and intra- and extracellular peaks. Black dashed vertical lines indicate the edge of the myelin water compartment (at 35 ms) and the intra- and extracellular water (at 220 ms). Dashed red and blue vertical lines indicate the IEW-gmT2 of UBO and cNAWM, respectively. CCS = splenium of corpus callosum; CbIP = cerebellar peduncle; CWM = cerebellar white matter; CP = cerebral peduncle; AC = anterior commissure; MES = mesencephalon; bulb = bulb
